# Supplementary material for: Predicting Progression of IgA Nephropathy: New Clinical Progression Risk Score
Source: PubMed Central journal article supplement (PMC3375310; doi:10.1371/journal.pone.0038904), 2012-06-14
Supplement: pone.0038904.s001.pdf [file pone.0038904.s001.pdf]

**Table S1. Unadjusted association of baseline characteristics with eGFR at presentation (univariate analysis).**

| Variable                             | Univariate analysis |              |                        |
|--------------------------------------|---------------------|--------------|------------------------|
|                                      | $\beta^*$           | 95% CI       | P value                |
| Age at biopsy [year]                 | -1.65               | -1.91, -1.39 | $<2.0 \times 10^{-16}$ |
| Gender (reference :Male)             | 8.15                | 1.16, 15.14  | 0.02                   |
| Positive family history              | 9.33                | -1.23, 19.89 | 0.08                   |
| Body mass index [kg/m <sup>2</sup> ] | -0.46               | -1.93, 1.00  | 0.53                   |
| SBP [mm Hg]                          | -0.98               | -1.14, -0.81 | $<2.0 \times 10^{-16}$ |
| Systolic HTN                         | -33.41              | -40.8, -26.1 | $<2.0 \times 10^{-16}$ |
| DBP [mm Hg]                          | -1.24               | -1.49, -0.99 | $<2.0 \times 10^{-16}$ |
| Diastolic HTN                        | -27.82              | -34.8, -20.8 | $3.0 \times 10^{-14}$  |
| MAP [mm Hg]                          | -1.28               | -1.51, -1.05 | $<2.0 \times 10^{-16}$ |
| Pulse pressure [mm Hg]               | -0.97               | -1.25, -0.69 | $3.0 \times 10^{-11}$  |
| Hypertension                         | -41.0               | -47.3, -34.8 | $<2.0 \times 10^{-16}$ |
| Urine protein [g/24h]                | -2.34               | -4.02, -0.67 | 0.006                  |
| Degree of proteinuria [per group]    | -13.00              | -17.6, -8.41 | $3.8 \times 10^{-8}$   |
| History of gross heamaturia          | 13.46               | 4.78, 22.1   | 0.002                  |
| Serum UA [mg/dl]                     | -13.33              | -15.1, -11.5 | $<2.0 \times 10^{-16}$ |
| Hyperuricemia                        | -37.5               | -44.0, -31.0 | $<2.0 \times 10^{-16}$ |
| Serum albumin [g/dL]                 | 1.94                | -2.54, 6.41  | 0.40                   |
| Hypoalbuminemia                      | 1.27                | -7.40, 9.93  | 0.77                   |
| Serum triglycerides [mg/dL]          | -0.04               | -0.09, 0.01  | 0.10                   |
| Serum cholesterol [mg/dL]            | -0.01               | -0.09, 0.07  | 0.80                   |
| Hemoglobin [g/dl]                    | 5.51                | 3.94, 7.08   | $1.2 \times 10^{-11}$  |
| Anemia                               | 29.45               | 22.7, 36.2   | $<2.0 \times 10^{-16}$ |
| WBC [ $10^3/\text{mm}^3$ ]           | 0.01                | -2.12, 2.13  | 0.99                   |
| Serum IgA [mg/L]                     | -0.003              | 0.01, -4.07  | 0.08                   |
| Haas classification [per type]       | -21.83              | -24.8, -18.9 | $<2.0 \times 10^{-16}$ |

SBP: systolic blood pressure; DBP: diastolic blood pressure; MAP: mean arterial pressure; UA: uric acid; WBC: white blood cells count;

\* Regression coefficient (change in eGFR per one unit change in the predictor).
