# Supplementary material for: Predicting Progression of IgA Nephropathy: New Clinical Progression Risk Score
Source: PubMed Central journal article supplement (PMC3375310; doi:10.1371/journal.pone.0038904), 2012-06-14
Supplement: pone.0038904.s002.pdf [file pone.0038904.s002.pdf]

**Table S2. Multivariate linear regression with stepwise selection for eGFR at the time of biopsy (n=619).**

| <b>Variable</b>                   | <b><math>\beta^*</math></b> | <b>95% CI</b> | <b>Model R<sup>2</sup> (%)</b> | <b>P value</b> |
|-----------------------------------|-----------------------------|---------------|--------------------------------|----------------|
| Age at biopsy [year]              | -1.06                       | -1.27, -0.86  | 7.6                            | $<2*10^{-16}$  |
| SBP [mm Hg]                       | -0.37                       | -0.51, -0.23  | 2.0                            | $2*10^{-7}$    |
| Degree of proteinuria [per group] | -5.18                       | -8.47, -1.89  | 0.7                            | $2*10^{-3}$    |
| Serum UA [mg/dl]                  | -8.23                       | -9.76, -6.70  | 8.3                            | $<2*10^{-16}$  |
| Hemoglobin [g/dl]                 | 2.90                        | 1.75, 4.04    | 1.8                            | $9*10^{-7}$    |
| Haas classification [per type]    | -11.30                      | -13.90, -8.70 | 5.4                            | $<2*10^{-16}$  |
| All covariates combined           |                             |               | 54.5                           | $<2*10^{-16}$  |

SBP: systolic blood pressure; UA: uric acid

\* regression coefficient (change in eGFR per one unit change in the predictor)
