# Supplementary material for: Predicting Progression of IgA Nephropathy: New Clinical Progression Risk Score
Source: PubMed Central journal article supplement (PMC3375310; doi:10.1371/journal.pone.0038904), 2012-06-14
Supplement: pone.0038904.s003.pdf [file pone.0038904.s003.pdf]

**Table S3. Baseline characteristics of age- and gender-matched healthy population controls.**

| Variable                         | IgAN Patients<br>N=619 |             | Population Controls<br>N=650 |             | P value                |
|----------------------------------|------------------------|-------------|------------------------------|-------------|------------------------|
|                                  | Values                 | Range       | Values                       | Range       |                        |
| Age [years]                      | 36.0±12.3              | 14-80       | 36.6 ± 8.3                   | 22-50       | 0.33                   |
| Gender (Male :Female)            | 1.03:1.00              |             | 1.06:1.00                    |             | 0.82                   |
| Serum creatinine [mg/dL]         | 1.5±1.1                | 0.6-7.4     | 0.9±0.1                      | 0.6-1.1     | <2.2*10 <sup>-16</sup> |
| GFR [mL/min/1.73m <sup>2</sup> ] | 87.9±44.4              | 10.3-290.2  | 122.6±17.6                   | 73.3±183.9  | <2.2*10 <sup>-16</sup> |
| Urine Protein [g/24h]            | 1.42                   | 0-13.9      | Negative                     |             |                        |
| Serum Uric Acid [mg/dl]          | 6.5±1.7                | 2.6-11.3    | 5.5±1.3                      | 2.7-10.0    | <2.2*10 <sup>-16</sup> |
| Hyperuricemia (%)                | 256 (41.4)             |             | 71 (10.9)                    |             | <2.2*10 <sup>-16</sup> |
| Serum Albumin [g/dL]             | 3.4±0.8                | 0.7-5.4     | 4.1±0.3                      | 3.3-5.0     | <2.2*10 <sup>-16</sup> |
| Hypoalbuminemia (%)              | 128 (20.7)             |             | 0                            |             |                        |
| Serum Triglycerides [mg/dL]      | 175.7                  | 42.5-1033.6 | 102.7                        | 44.3-878.8  | <2.2*10 <sup>-16</sup> |
| Serum Cholesterol [mg/dL]        | 198.1                  | 32.1-469.1  | 179.2                        | 103.1-312.0 | 1.8*10 <sup>-11</sup>  |
| Hemoglobin [g/dl]                | 13.0±2.2               | 5.6-18.2    | 13.7±1.6                     | 7.8-17.9    | <2.2*10 <sup>-16</sup> |
| Anemia (%)                       | 261 (42.2)             |             | 94 (14.5)                    |             | <2.2*10 <sup>-16</sup> |
