# Supplementary material for: Predicting Progression of IgA Nephropathy: New Clinical Progression Risk Score
Source: PubMed Central journal article supplement (PMC3375310; doi:10.1371/journal.pone.0038904), 2012-06-14
Supplement: pone.0038904.s004.pdf [file pone.0038904.s004.pdf]

**Table S4. Patient characteristics by the diagnosis of anemia and hypoalbuminemia.**

|                                                | Anemia       |               | Hypoalbuminemia |              |
|------------------------------------------------|--------------|---------------|-----------------|--------------|
|                                                | Yes<br>N=261 | No<br>N=358   | Yes<br>N=128    | No<br>N=491  |
| <b>Outcomes:</b>                               |              |               |                 |              |
| ESRD Events (%)                                | 51 (19.5)    | 16 (4.5)***   | 24 (18.8)       | 43 (8.8)**   |
| <b>Baseline Characteristics:</b>               |              |               |                 |              |
| Gender: Male (%)                               | 141 (54.0)   | 173 (48.3)    | 65 (50.8)       | 249 (50.7)   |
| Age at biopsy (±s.d.), [years]                 | 37.9±12.5    | 34.7±12.0**   | 33.9±13.5       | 36.6±11.9*   |
| GFR mean (±s.d.), [mL/min/1.73m <sup>2</sup> ] | 70.9±45.9    | 100.3±38.9*** | 86.9±46.4       | 88.2±44.0    |
| SBP mean (±s.d.), [mm Hg]                      | 130.1±20.4   | 126.8±17.7*   | 127.1±18.0      | 128.5±19.2   |
| DBP mean (±s.d.), [mm Hg]                      | 83.1±13.7    | 82.1±12.4     | 81.9±13.9       | 82.7±12.7    |
| Urine protein groups                           |              |               |                 |              |
| Mild (<1g/24h) (%)                             | 85 (32.6)    | 152 (42.5)    | 8 (6.2)         | 229(46.6)    |
| Moderate (1~3g/24h) (%)                        | 112 (42.9)   | 142 (39.7)    | 52(40.6)        | 202(41.1)    |
| Severe (≥3g/24h) (%)                           | 64 (24.5)    | 64 (17.9)*    | 68 (53.1)       | 60(12.2)***  |
| Gross hematuria (%)                            | 53 (20.3)    | 72 (20.1)     | 19 (14.8)       | 106(21.6)    |
| Serum UA mean (±s.d.), [mg/dl]                 | 6.9±1.8      | 6.2±1.6***    | 6.6±1.8         | 6.5±1.7      |
| Serum albumin mean (±s.d.), [g/dL]             | 3.3±0.7      | 3.5±0.9***    | 2.2±0.6         | 3.7±0.4***   |
| Hemoglobin mean (±s.d.), [g/dl]                | 11.0±1.7     | 14.2±1.3***   | 12.3±2.5        | 13.0±2.0**   |
| Haas classification                            |              |               |                 |              |
| Grade I-III (%)                                | 37(14.2)     | 115(32.1)     | 38(29.7)        | 114(23.2)    |
| Grade IV-V (%)                                 | 224 (85.8)   | 243(67.9)***  | 90(70.3)        | 377(76.8)    |
| Glucocorticoid treatment (%)                   | 143 (62.7)   | 150 (48.7)**  | 100 (84.7)      | 193(46.2)*** |

\* Two-sided P<0.05

\*\* Two-sided P<0.01

\*\*\* Two-sided P<0.001
