# Supplementary material for: Predicting Progression of IgA Nephropathy: New Clinical Progression Risk Score
Source: PubMed Central journal article supplement (PMC3375310; doi:10.1371/journal.pone.0038904), 2012-06-14
Supplement: pone.0038904.s005.pdf [file pone.0038904.s005.pdf]

**Table S5. Assessment of the predictive value of proteinuria in the risk of ESRD.** The best model (**model 1**) excludes proteinuria, has lowest AIC and BIC, and explains 22% of variance in the outcome. Proteinuria is not significant in the full model (**model 2**), although the effect estimate is suggestive of increased risk with higher urine protein excretion (HR 1.21, p=0.32). Exclusion of albumin in **model 3** unmasks highly significant association of proteinuria with the risk of progression (HR 1.56, p=9.7 x 10<sup>-3</sup>). Additional exclusion of hemoglobin has little effect on the strength of this association (**model 4**).

|                | Selection Criteria |       |       | Significance of Individual Predictors in the Model (Wald test) |                           |                            |                            |                           |                             |
|----------------|--------------------|-------|-------|----------------------------------------------------------------|---------------------------|----------------------------|----------------------------|---------------------------|-----------------------------|
|                | R2                 | AIC   | BIC   | eGFR<br>P-value                                                | SBP<br>P-value            | Hemoglobin<br>P-value      | Albumin<br>P-value         | Proteinuria #<br>P-value  | Proteinuria #<br>HR (95%CI) |
| <b>Model 1</b> | 0.22               | 523.8 | 541.5 | 1.3 x 10 <sup>-14</sup> ***                                    | 5.4 x 10 <sup>-3</sup> ** | 1.2 x 10 <sup>-5</sup> *** | 7.4 x 10 <sup>-5</sup> *** | --                        | --                          |
| <b>Model 2</b> | 0.22               | 524.8 | 547.0 | 1.4 x 10 <sup>-13</sup> ***                                    | 0.012 *                   | 1.1 x 10 <sup>-5</sup> *** | 3.1 x 10 <sup>-3</sup> **  | 0.32 (NS)                 | 1.21 (0.83-1.75)            |
| <b>Model 3</b> | 0.21               | 531.1 | 548.8 | 5.6 x 10 <sup>-12</sup> ***                                    | 0.081                     | 7.6 x 10 <sup>-7</sup> *** | --                         | 9.7 x 10 <sup>-3</sup> ** | 1.56 (1.11-2.19)            |
| <b>Model 4</b> | 0.18               | 552.4 | 565.7 | 2.9 x 10 <sup>-13</sup> ***                                    | 0.037 *                   | --                         | --                         | 8.1 x 10 <sup>-3</sup> ** | 1.55 (1.12-2.15)            |

\* Two-sided P<0.05

\*\* Two-sided P<0.01

\*\*\* Two-sided P<0.001

# Log-transformed

Model 1: predictors include baseline eGFR, systolic blood pressure (SBP), hemoglobin, albumin (the best model used for risk score derivation).

Model 2: predictors include baseline eGFR, SBP, hemoglobin, albumin, and proteinuria (proteinuria is not significant in this model).

Model 3: predictors include baseline eGFR, SBP, hemoglobin, and proteinuria (proteinuria becomes highly significant after exclusion of albumin).

Model 4: predictors include baseline eGFR, SBP, and proteinuria (proteinuria slightly more significant after exclusion of albumin and hemoglobin).
