# Supplementary material for: Predicting Progression of IgA Nephropathy: New Clinical Progression Risk Score
Source: PubMed Central journal article supplement (PMC3375310; doi:10.1371/journal.pone.0038904), 2012-06-14
Supplement: pone.0038904.s006.pdf [file pone.0038904.s006.pdf]

**Table S6. Patient characteristics by risk score tertiles.**

|                                                | Risk Score                       |                                  |                                  | P-value               |
|------------------------------------------------|----------------------------------|----------------------------------|----------------------------------|-----------------------|
|                                                | 1 <sup>st</sup> Tertile<br>N=206 | 2 <sup>nd</sup> Tertile<br>N=206 | 3 <sup>rd</sup> Tertile<br>N=207 |                       |
| <b>Outcomes:</b>                               |                                  |                                  |                                  |                       |
| Risk Score Interval                            | < -0.89                          | -0.89-0.99                       | >0.99                            |                       |
| ESRD Events (%)                                | 1 (0.5)                          | 18 (8.7)                         | 48 (23.2)                        |                       |
| HR (95%CI)                                     | - reference -                    | 15.3 (2.0-115.0)                 | 79.8 (11.0-580.3)                |                       |
| <b>Baseline Characteristics:</b>               |                                  |                                  |                                  |                       |
| Gender: Male (%)                               | 92 (44.7)                        | 119 (57.8)                       | 103 (49.8)                       | 0.03                  |
| Age at biopsy (±s.d.), [years]                 | 29.2±10.3                        | 38.4±11.2                        | 40.5±12.3                        | <2*10 <sup>-16</sup>  |
| GFR mean (±s.d.), [mL/min/1.73m <sup>2</sup> ] | 134.2±31.7                       | 85.9±21.6                        | 43.8±19.0                        | <2*10 <sup>-16</sup>  |
| SBP mean (±s.d.), [mm Hg]                      | 119.2±13.4                       | 127.5±15.8                       | 137.8±21.8                       | <2*10 <sup>-16</sup>  |
| DBP mean (±s.d.), [mm Hg]                      | 77.0±10.3                        | 83.0±11.5                        | 87.5±14.5                        | <2*10 <sup>-16</sup>  |
| Urine protein groups                           |                                  |                                  |                                  | 2.5*10 <sup>-13</sup> |
| Mild (<1g/24h) (%)                             | 115 (55.8)                       | 82 (39.8)                        | 40 (19.3)                        |                       |
| Moderate (1~3g/24h) (%)                        | 65 (31.6)                        | 89 (43.2)                        | 100 (48.3)                       |                       |
| Severe (≥3g/24h) (%)                           | 26 (12.6)                        | 35 (17.0)                        | 67 (32.4)                        |                       |
| Gross hematuria (%)                            | 62 (30.1)                        | 29 (14.1)                        | 34 (16.4)                        | 1.1*10 <sup>-4</sup>  |
| Serum UA mean (±s.d.), [mg/dl]                 | 5.6±1.4                          | 6.5±1.5                          | 7.4±1.6                          | <2*10 <sup>-16</sup>  |
| Serum albumin mean (±s.d.), [g/dL]             | 3.7±0.7                          | 3.4±0.9                          | 3.2±0.7                          | 2.0*10 <sup>-13</sup> |
| Hemoglobin mean (±s.d.), [g/dl]                | 13.7±1.6                         | 13.4±2.1                         | 11.4±2.1                         | <2*10 <sup>-16</sup>  |
| Haas classification                            |                                  |                                  |                                  | <2*10 <sup>-16</sup>  |
| Grade I (%)                                    | 5(2.4)                           | 9(4.4)                           | 2(1.0)                           |                       |
| Grade II (%)                                   | 72(35.0)                         | 45(21.8)                         | 19(9.2)                          |                       |
| Grade III (%)                                  | 109(52.9)                        | 89(43.2)                         | 53(25.6)                         |                       |
| Grade IV (%)                                   | 17(8.3)                          | 40(19.4)                         | 73(35.3)                         |                       |
| Grade V (%)                                    | 3 (1.5)                          | 23(11.2)                         | 60(29.0)                         |                       |
| Glucocorticoid treatment (%)                   | 67 (40.4)                        | 90 (51.1)                        | 136 (70.1)                       | 4.6*10 <sup>-8</sup>  |
